# Supplementary material for: Dietary Diversity and Micronutrients Adequacy in Women of Childbearing Age: Results from ELANS Study
Source: PubMed Central journal article supplement (PMC7400493; doi:10.3390/nu12071994), 2020-07-04
Supplement: nutrients-12-01994-s001.pdf [file nutrients-12-01994-s001.pdf]

**Table S1.** Mean nutrients adequacy ratio of specific nutrients of women of childbearing age by country. ELANS 2014–2015.

|             | Argentina      | Brazil         | Chile          | Colombia       | Costa Rica     | Ecuador        | Peru           | Venezuela      | ELANS           |
|-------------|----------------|----------------|----------------|----------------|----------------|----------------|----------------|----------------|-----------------|
|             | <i>n</i> = 521 | <i>n</i> = 798 | <i>n</i> = 345 | <i>n</i> = 464 | <i>n</i> = 309 | <i>n</i> = 324 | <i>n</i> = 480 | <i>n</i> = 463 | <i>n</i> = 3704 |
| Vitamin E   | 0.040 ± 0.01   | 0.019 ± 0.01   | 0.024 ± 0.01   | 0.043 ± 0.02   | 0.027 ± 0.01   | 0.051 ± 0.02   | 0.030 ± 0.01   | 0.020 ± 0.01   | 0.031 ± 0.02    |
| Vitamin D   | 0.307 ± 0.14   | 0.192 ± 0.11   | 0.303 ± 0.17   | 0.457 ± 0.20   | 0.255 ± 0.13   | 0.564 ± 0.23   | 0.521 ± 0.21   | 0.272 ± 0.12   | 0.343 ± 0.21    |
| Calcium     | 0.928 ± 0.25   | 0.449 ± 0.49   | 0.553 ± 0.49   | 0.928 ± 0.25   | 0.417 ± 0.49   | 0.904 ± 0.29   | 0.545 ± 0.49   | 0.831 ± 0.37   | 0.684 ± 0.46    |
| Folate      | 0.715 ± 0.19   | 0.792 ± 0.18   | 0.649 ± 0.18   | 0.652 ± 0.15   | 0.665 ± 0.17   | 0.730 ± 0.16   | 0.664 ± 0.16   | 0.663 ± 0.16   | 0.702 ± 0.18    |
| Magnesium   | 0.701 ± 0.15   | 0.709 ± 0.18   | 0.648 ± 0.15   | 0.901 ± 0.14   | 0.784 ± 0.18   | 0.909 ± 0.12   | 0.885 ± 0.13   | 0.833 ± 0.16   | 0.788 ± 0.18    |
| Vitamin C   | 0.860 ± 0.20   | 0.799 ± 0.24   | 0.876 ± 0.16   | 0.950 ± 0.12   | 0.916 ± 0.16   | 0.896 ± 0.17   | 0.955 ± 0.10   | 0.852 ± 0.18   | 0.873 ± 0.21    |
| Vitamin A   | 0.705 ± 0.23   | 0.834 ± 0.26   | 0.802 ± 0.23   | 0.956 ± 0.12   | 0.843 ± 0.22   | 0.993 ± 0.05   | 0.953 ± 0.12   | 0.955 ± 0.12   | 0.879 ± 0.19    |
| Piridoxine  | 0.972 ± 0.07   | 0.947 ± 0.11   | 0.955 ± 0.10   | 0.993 ± 0.06   | 0.954 ± 0.12   | 0.996 ± 0.03   | 0.995 ± 0.03   | 0.985 ± 0.06   | 0.973 ± 0.08    |
| Zinc        | 0.997 ± 0.03   | 0.961 ± 0.10   | 0.945 ± 0.10   | 0.991 ± 0.06   | 0.957 ± 0.10   | 0.981 ± 0.05   | 0.985 ± 0.06   | 0.982 ± 0.06   | 0.977 ± 0.07    |
| Iron        | 0.993 ± 0.03   | 0.912 ± 0.19   | 0.984 ± 0.30   | 0.998 ± 0.02   | 0.991 ± 0.40   | 0.999 ± 0.00   | 0.997 ± 0.52   | 0.991 ± 0.04   | 0.977 ± 0.08    |
| Phosphorous | 0.983 ± 0.07   | 0.964 ± 0.10   | 0.967 ± 0.09   | 0.988 ± 0.06   | 0.960 ± 0.11   | 0.992 ± 0.06   | 0.985 ± 0.06   | 0.982 ± 0.07   | 0.977 ± 0.08    |
| Cobalamin   | 0.982 ± 0.09   | 0.973 ± 0.10   | 0.956 ± 0.12   | 0.987 ± 0.09   | 0.988 ± 0.06   | 0.989 ± 0.05   | 0.986 ± 0.06   | 0.985 ± 0.07   | 0.980 ± 0.09    |
| Cobre       | 0.998 ± 0.02   | 0.974 ± 0.08   | 0.959 ± 0.09   | 0.993 ± 0.06   | 0.972 ± 0.08   | 0.998 ± 0.01   | 0.998 ± 0.02   | 0.965 ± 0.09   | 0.982 ± 0.07    |
| Niacin      | 0.997 ± 0.02   | 0.992 ± 0.04   | 0.994 ± 0.04   | 1.000 ± 0.00   | 0.994 ± 0.04   | 1.000 ± 0.00   | 0.997 ± 0.04   | 0.998 ± 0.02   | 0.997 ± 0.03    |
| Riboflavin  | 0.998 ± 0.02   | 0.973 ± 0.08   | 0.979 ± 0.07   | 0.995 ± 0.05   | 0.987 ± 0.05   | 0.986 ± 0.05   | 0.993 ± 0.04   | 0.992 ± 0.04   | 0.988 ± 0.06    |
| Thiamin     | 0.998 ± 0.01   | 0.962 ± 0.09   | 0.985 ± 0.06   | 0.996 ± 0.04   | 0.994 ± 0.03   | 0.999 ± 0.00   | 0.999 ± 0.00   | 0.997 ± 0.03   | 0.989 ± 0.05    |
| Selenium    | 0.999 ± 0.00   | 0.997 ± 0.02   | 0.998 ± 0.02   | 0.997 ± 0.05   | 0.997 ± 0.02   | 1.000 ± 0.00   | 1.000 ± 0.00   | 0.999 ± 0.00   | 0.998 ± 0.02    |
| MAR         | 0.834 ± 0.04   | 0.791 ± 0.08   | 0.799 ± 0.07   | 0.872 ± 0.05   | 0.806 ± 0.07   | 0.882 ± 0.03   | 0.852 ± 0.05   | 0.841 ± 0.04   | 0.831 ± 0.07    |

MAR: Mean Adequacy ratio for all 17 micronutrients.
